# Supplementary material for: Room Temperature Ionic Liquids in Asymmetric Hetero-Ene Type Reactions: Improving Organocatalyst Performance at Lower Temperatures
Source: MDPI journal article supplement (doi:10.3390/molecules26020355), 2021-01-12
Supplement: s1 [file s1]

## Supporting Information

# Room temperature ionic liquids in asymmetric hetero-ene type reactions: Improving organocatalyst performance at lower temperatures

Fabrizio R. Bisogno,<sup>1</sup> Rosario Fernández,<sup>2</sup> José M. Lassaletta<sup>3</sup> and Gonzalo de Gonzalo<sup>2,\*</sup>

<sup>1</sup> Facultad de Ciencias Químicas, Instituto de Investigaciones en Físico-Química de Córdoba, Universidad Nacional de Córdoba, Haya de la Torre y Medina Allende, Ciudad Universitaria, 5000, Córdoba, Argentina.

<sup>2</sup> Departamento de Química Orgánica, Universidad de Sevilla, c/ Profesor García González 1, 41012, Sevilla, Spain.

<sup>3</sup> Instituto de Investigaciones Químicas (CSIC-US) and Centro de Innovación en Química Avanzada (ORFEO-CINQA), Avda. Américo Vespucio 49, 41092, Sevilla, Spain.

|                                 |   |
|---------------------------------|---|
| 1. Experimental procedures..... | 2 |
| 2. HPLC analyses.....           | 4 |
| 3. References.....              | 5 |

## 1. Experimental procedures.

### 1.1. Organocatalyzed addition of hydrazone **1** to $\alpha$ -ketoesters **2a-f** catalyzed by thiourea **III** in presence of 10% v/v [hmim]PF<sub>6</sub>.

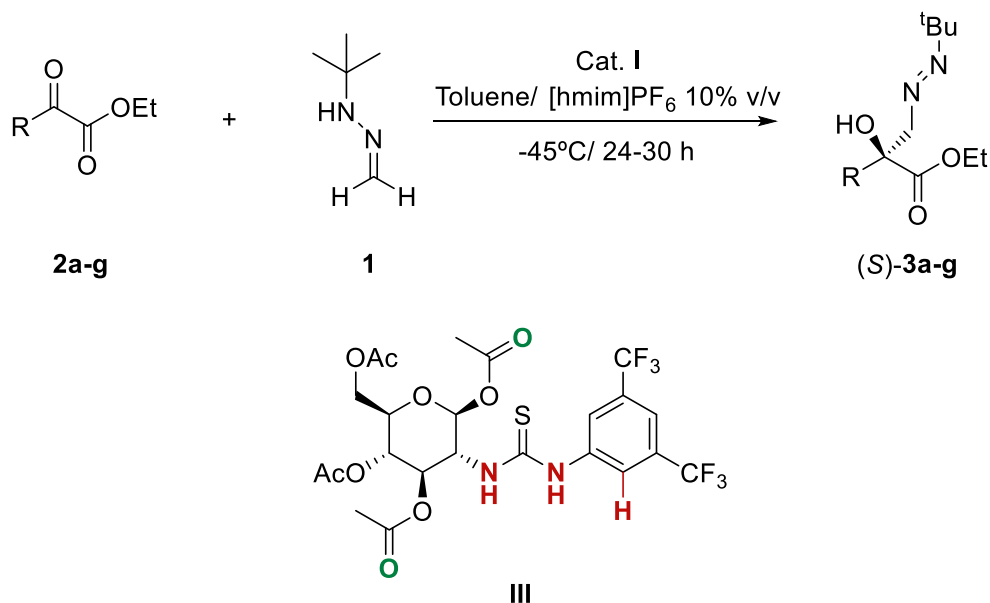

Formaldehyde *tert*-butyl hydrazone **1** (134  $\mu\text{L}$ , 1.2 mmol) was added to a solution of  $\alpha$ -ketoester **2a-g** (0.6 mmol) and catalyst **I** (0.06 mmol) in 0.6 mL of the mixture toluene/[hmim]PF<sub>6</sub> 9:1 at -45  $^\circ\text{C}$ . Reactions were stirred for 24-30 hours and solvent was removed under reduced pressure. The crude mixtures were analyzed by <sup>1</sup>H-NMR in CDCl<sub>3</sub> in order to determine the conversion of the reactions: 73% for **2a**, 77% for **2b**, 75% for **2c**, 67% for **2d**, 74% for **2e**, 13% for **2f** and 69% for **2g**. Flash chromatography was then performed using as eluent toluene/EtOAc 8:1 mixture for compounds **3a-f** and toluene/EtOAc 6:1 for compound **2g** to afford the corresponding optically active azomethyl alcohols (*S*)-**3a** with 60% yield (110.2 mg), (*S*)-**3b** with 68% yield (99.5 mg), (*S*)-**3c** with 58% yield (84.9 mg), (*S*)-**3d** with 61% yield (79.0 mg), (*S*)-**3e** with 65% yield (111.5 mg), (*S*)-**3f** with 8% yield (12.4 mg) and (*S*)-**3g** with 62% yield (108.6 mg). Physical and spectroscopical properties of compounds **3a-g** are in accord with those reported [1]. The optical purity of compounds (*S*)-**3a**, (*S*)-**3c** and (*S*)-**3g** was directly determined by HPLC on chiral stationary phases, while (*S*)-**3b**, (*S*)-**3d-f** were previously converted into their corresponding azoxymethyl alcohols by treatment with magnesium monoperoxyphthalate (MMPP) in methanol.

## 1.2. Organocatalyzed addition of hydrazone **1** to ethyl benzoylformate (**2h**) catalyzed by **I**.

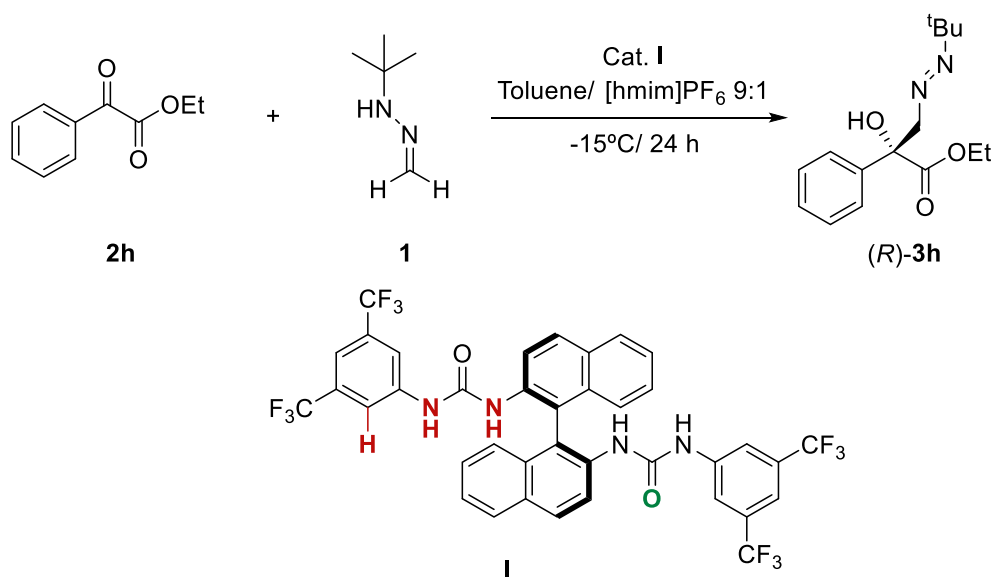

Formaldehyde *tert*-butyl hydrazone **1** (134  $\mu$ L, 1.2 mmol) was added to a solution of ethyl benzoylformate **2h** (0.6 mmol) and catalyst **I** (0.06 mmol) in 0.6 mL of the mixture toluene/[hmim]PF<sub>6</sub> 9:1 at -15 °C. Reactions were stirred for 24 hours and solvent was removed under reduced pressure. The crude mixture was analysed by <sup>1</sup>H-NMR in CDCl<sub>3</sub> in order to determine the conversion of the reaction (71%). Flash chromatography was then performed using as eluent toluene/EtOAc 8:1 mixture to afford the corresponding optically active azomethyl alcohol (*R*)-**3h** with 62% yield (103.4 mg), whose physical and chemical properties are in accord with those reported [2]. The optical purity of (*R*)-**3h** (89% *ee*) was determined directly by HPLC or chiral stationary phase.

### 3. HPLC analyses

In order to determine the enantiomeric excesses of azomethyl alcohols (*S*)-**3b** and (*S*)-**3d-f**, these compounds have to be converted first in their azoxymethyl derivatives following the general procedure: (*S*)-**3b,d-f** (0.2 mmol) were dissolved in MeOH (2 mL), cooled to 0 °C, and MMPP (0.5 g, 5 equiv.) was added. The reaction mixture was stirred until the consumption of the azomethyl alcohol **3** (TLC monitoring toluene/EtOAc 6:1, 2–3 h.), diluted with H<sub>2</sub>O (5 mL) and extracted with CH<sub>2</sub>Cl<sub>2</sub> (3 × 5 mL). The organic phases were dried over Na<sub>2</sub>SO<sub>4</sub> and concentrated in *vacuo*. The resulting residue was purified by flash chromatography (toluene/EtOAc 6:1) to afford the corresponding azoxymethyl alcohols with yields around 75–90%.

HPLC analyses were performed on a Waters 2695 Instrument equipped with a Waters 996 Photodiode Array Detector. The following columns were employed for the determination of the optical purities of azomethyl alcohols (*S*)-**3a-g** and (*R*)-**3h**: Column A: Chiralpak AD-H (0.46 cm x 25 cm, Daicel) and column B: Chiralpak OJ-H (0.46 cm x 25 cm, Daicel):

**Table S.1.** Determination of enantiomeric excess values by HPLC.

| Product   | Column | Flow rate<br>[mL min <sup>-1</sup> ] | T [ °C] | Eluent <sup>[a]</sup>     | Retention time [min]                 |
|-----------|--------|--------------------------------------|---------|---------------------------|--------------------------------------|
| <b>3a</b> | A      | 1.0                                  | 30      | <i>n</i> -hexane/IPA 98:2 | 7.8 ( <i>R</i> ); 8.9 ( <i>S</i> )   |
| <b>3b</b> | A      | 1.0                                  | 30      | <i>n</i> -hexane/IPA 98:2 | 9.9 ( <i>R</i> ); 10.5 ( <i>S</i> )  |
| <b>3c</b> | A      | 1.0                                  | 30      | <i>n</i> -hexane/IPA 98:2 | 5.6 ( <i>R</i> ); 6.7 ( <i>S</i> )   |
| <b>3d</b> | B      | 1.0                                  | 30      | <i>n</i> -hexane/IPA 98:2 | 11.5 ( <i>S</i> ); 13.5 ( <i>R</i> ) |
| <b>3e</b> | A      | 1.0                                  | 30      | <i>n</i> -hexane/IPA 98:2 | 4.3 ( <i>R</i> ); 4.9 ( <i>S</i> )   |
| <b>3f</b> | A      | 1.0                                  | 30      | <i>n</i> -hexane/IPA 9:1  | 4.1 ( <i>R</i> ); 4.6 ( <i>S</i> )   |
| <b>3g</b> | B      | 1.0                                  | 30      | <i>n</i> -hexane/IPA 98:2 | 13.5 ( <i>S</i> ); 14.9 ( <i>R</i> ) |
| <b>3h</b> | A      | 1.0                                  | 30      | <i>n</i> -hexane/IPA 98:2 | 12.7 ( <i>R</i> ); 20.8 ( <i>S</i> ) |

[a] All the experiments were performed with isocratic eluent.

#### 4. References

- [1] Carmona, J. A.; de Gonzalo, G.; Serrano, I.; Crespo-Peña, A. M.; Simek, M.; Monge, D.; Fernández, R.; Lassaletta, J. M. Asymmetric organocatalytic synthesis of tertiary azomethyl alcohols: key intermediates towards azoxy compounds and  $\alpha$ -hydroxy- $\beta$ -amino esters. *Org. Biomol. Chem.* **2017**, *15*, 2993–3005.
- [2] Crespo-Peña, A.; Monge, D.; Martín-Zamora, E.; Álvarez, E.; Fernández, R.; Lassaletta, J. M. Asymmetric formal carbonyl-ene reactions of formaldehyde *tert*-butyl hydrazone with  $\alpha$ -keto esters: Dual activation by Bis-urea catalysts. *J. Am. Chem. Soc.* **2012**, *134*, 12912–12915.
